# Supplementary material for: Multi-Level Analysis and Identification of Tumor Mutational Burden Genes across Cancer Types
Source: MDPI journal article supplement (doi:10.3390/genes13020365), 2022-02-17
Supplement: s1 [file s1]

**Figure S1.** Methodology of gene panel selection and TMB gene analysis. SepPanel selection criteria were conducted from gene number, mutation frequency and synonymous mutation included or not in calculating TMB. Gene collection were derived from literatures, immune related pathway, NCCN guideline and drug target gene. SepPanel were assessed from  $R^2$ , gene functional enrichment, random gene panel and potentially target gene. TMB related DEGs were analyzed the association with TILs and prognosis.

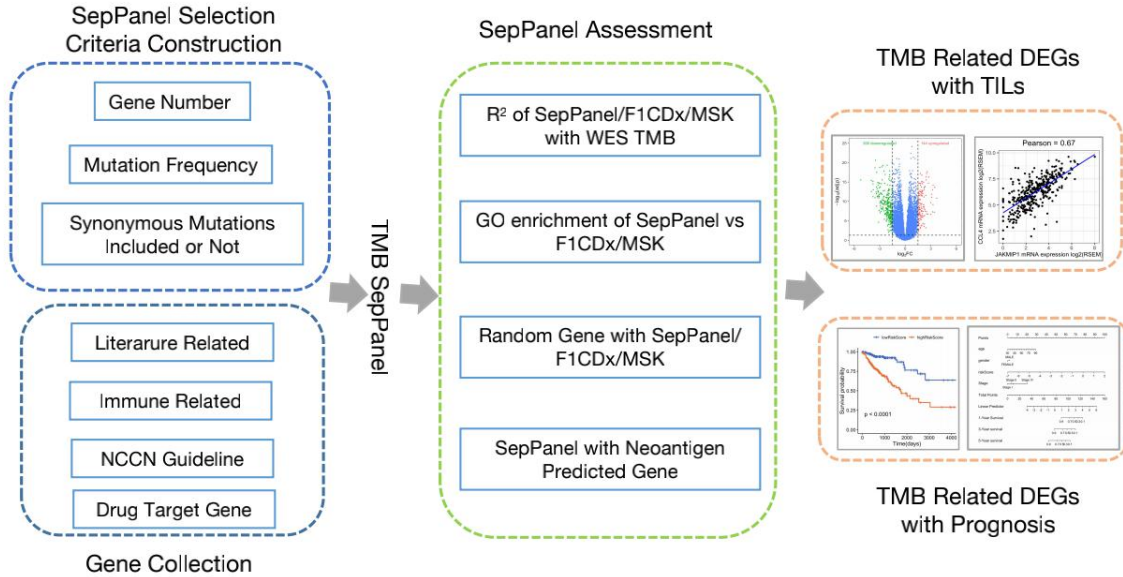

**Figure S2.** TMB distribution in different cancer types. The red dotted line represents the 20 muts/MB. Orange bar represents samples percent less than 20 muts/MB, and green bar represents samples percent more than 20 muts/MB.

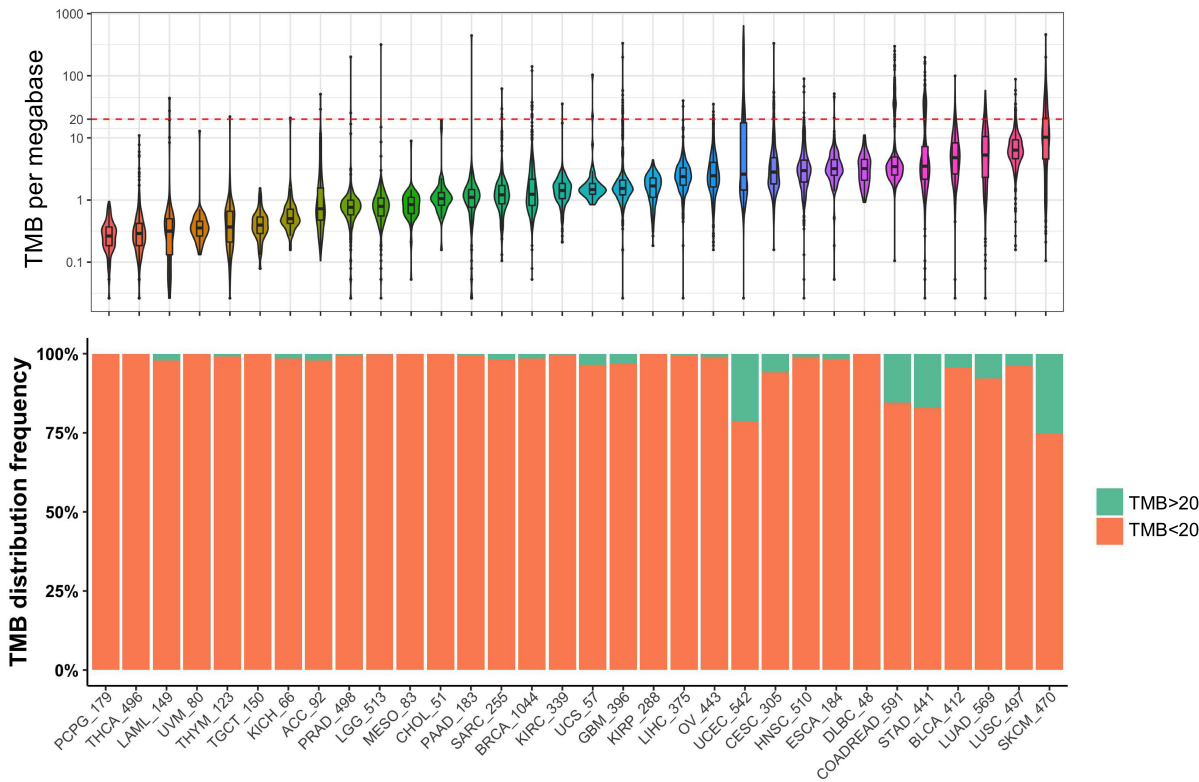

**Figure S3.** Coefficient of determination of linear regression ( $R^2$ ) between random gene panel TMB and WES TMB cross cancer. With the increase of random gene in gene panel,  $R^2$  had tendency becoming flat, except for KIRP, PCPG and TGCT.

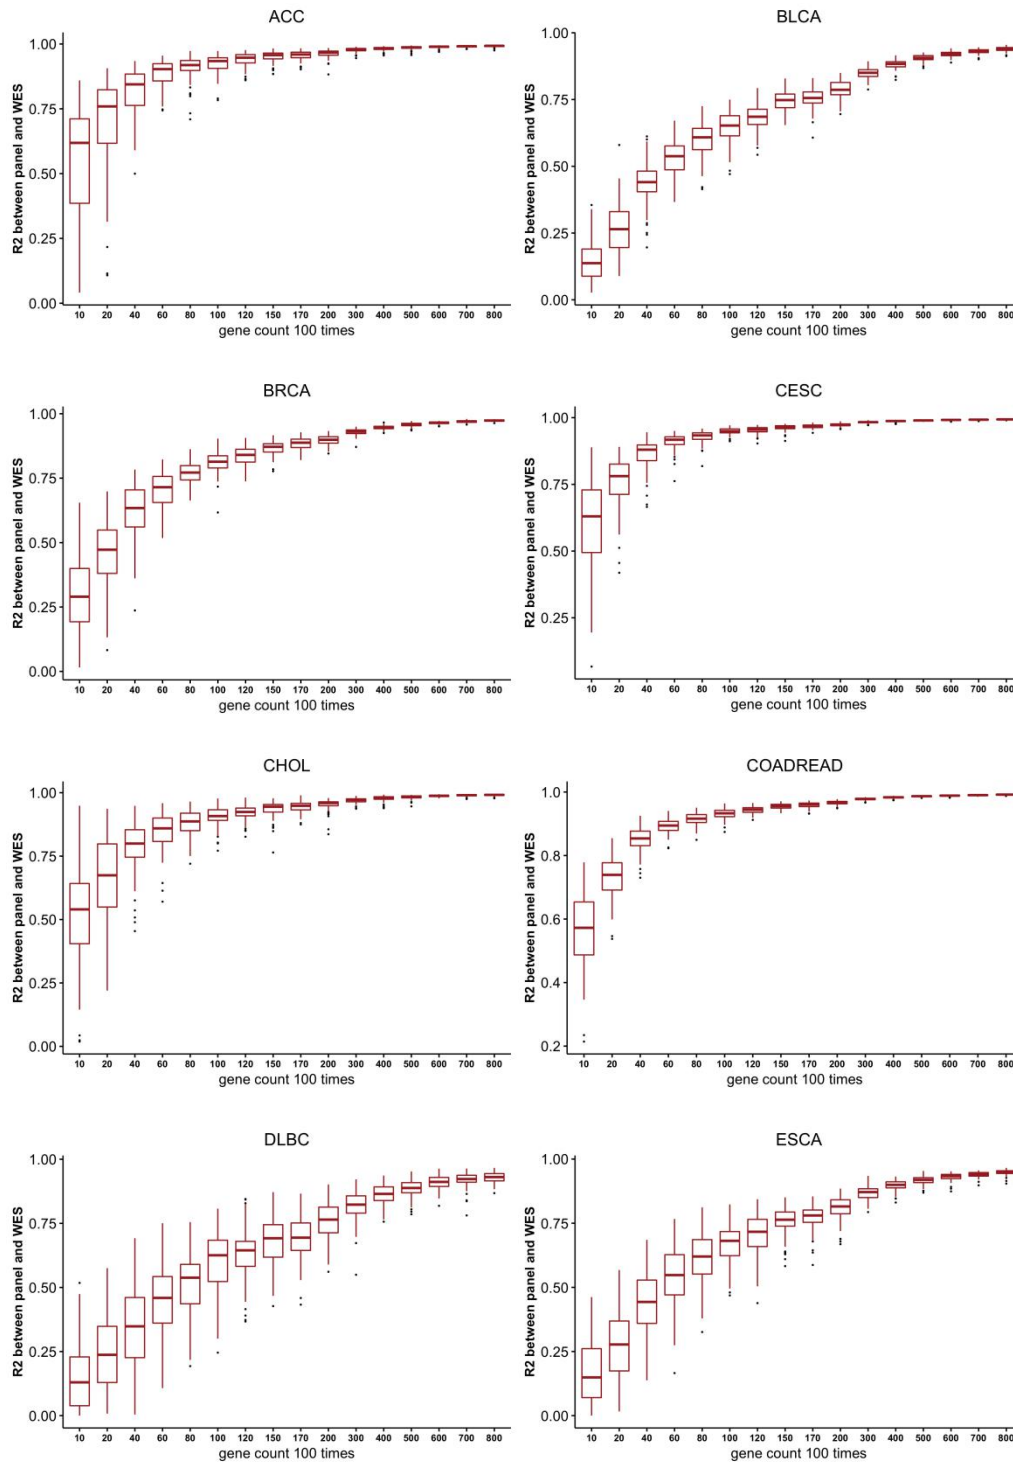

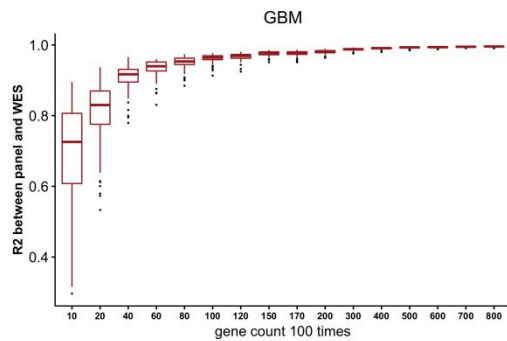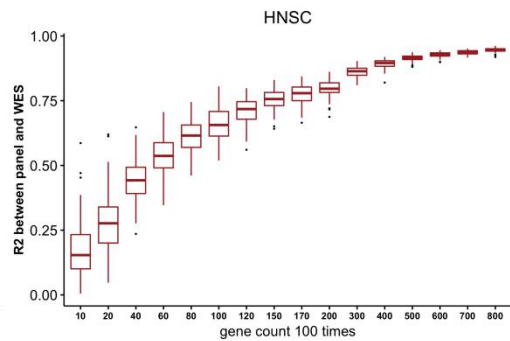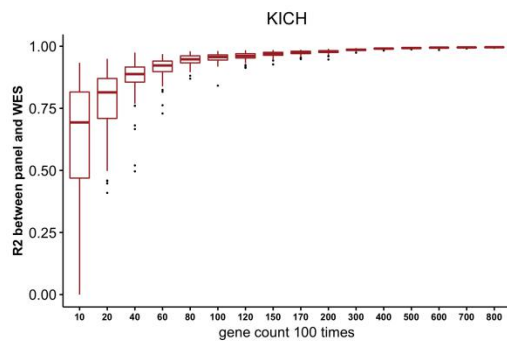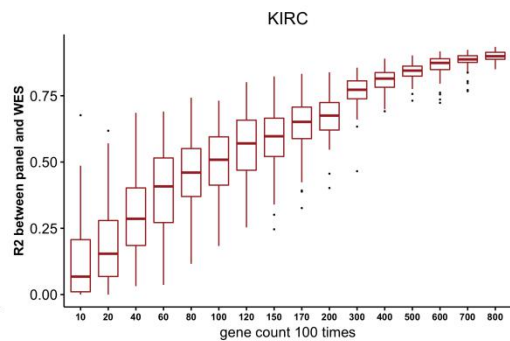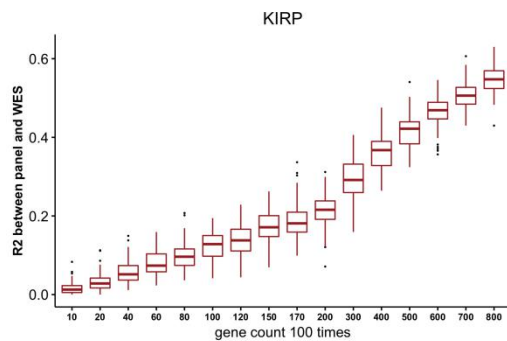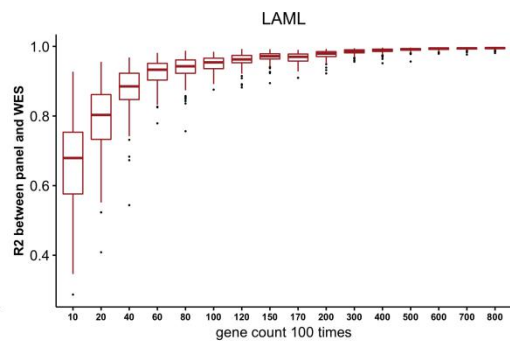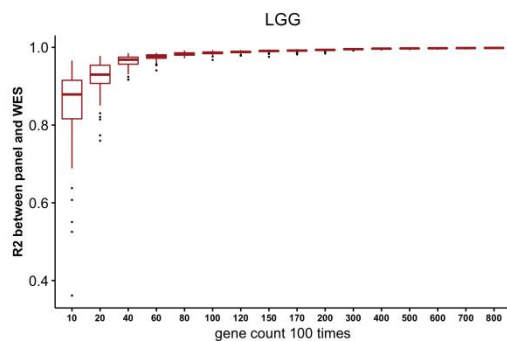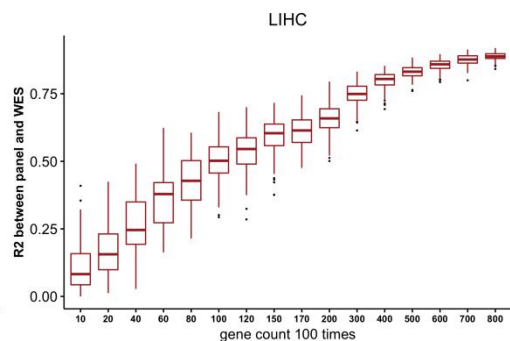

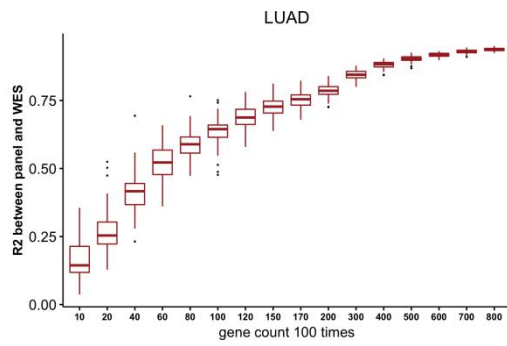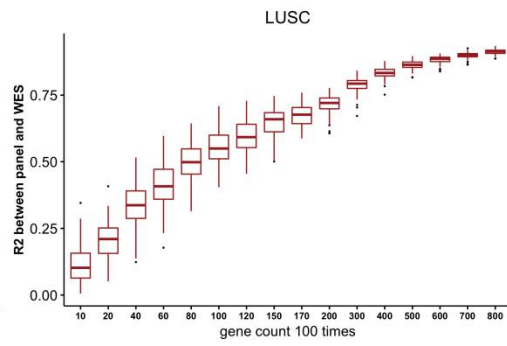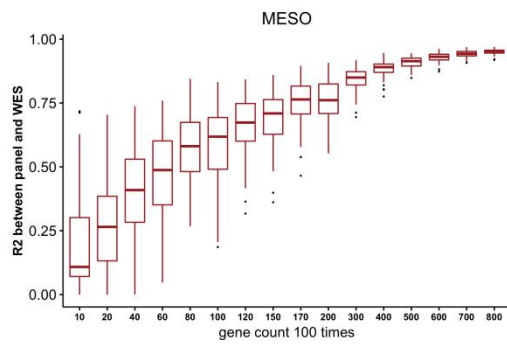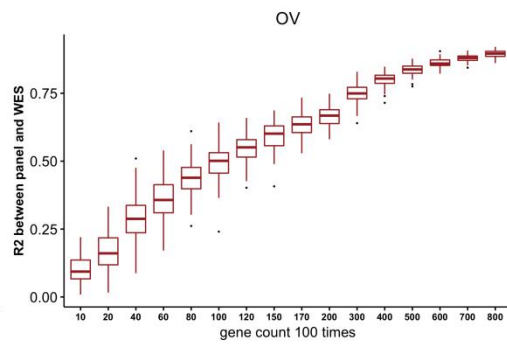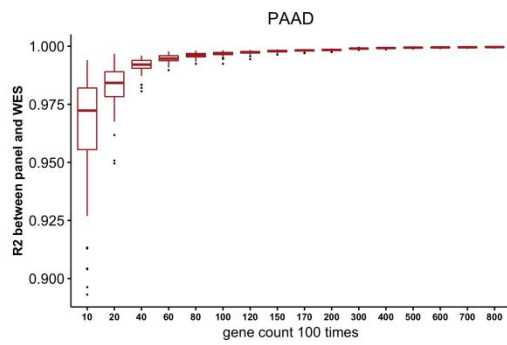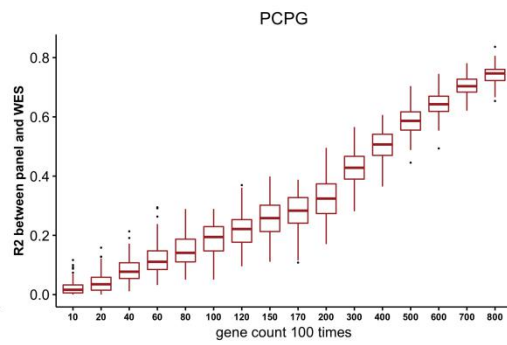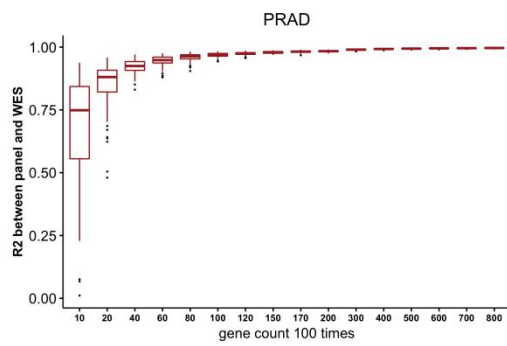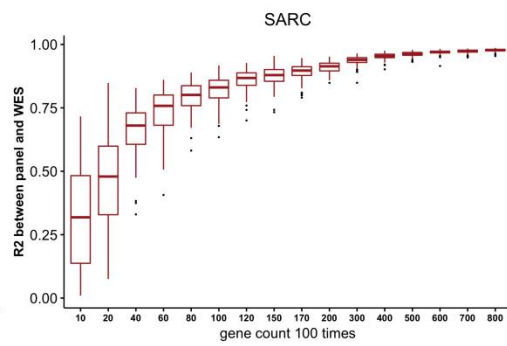

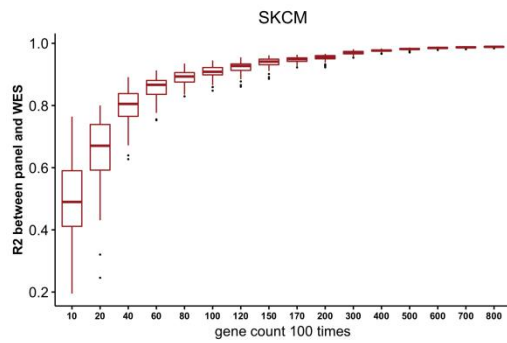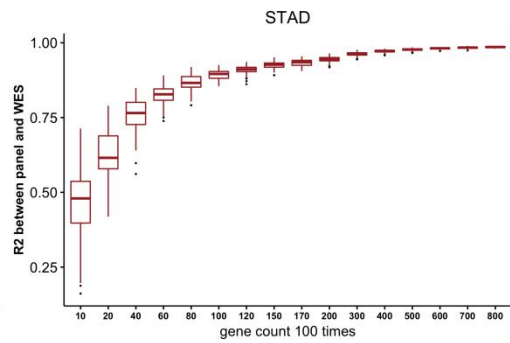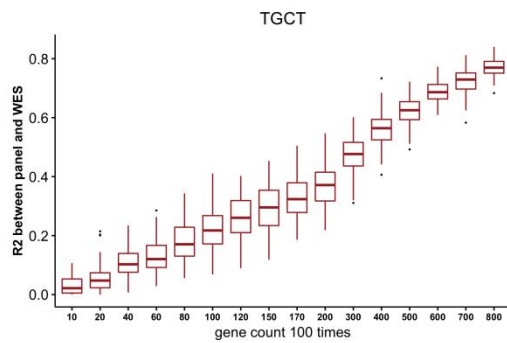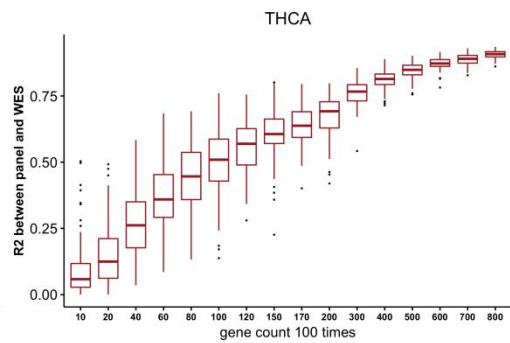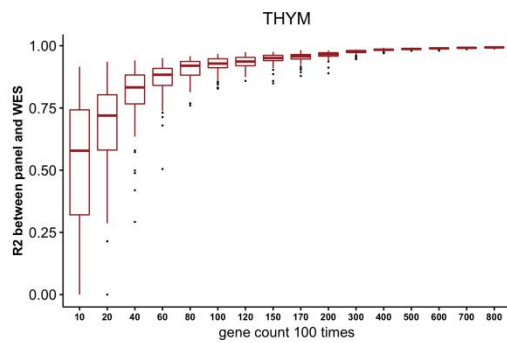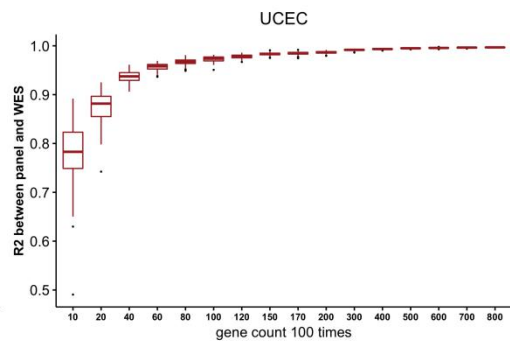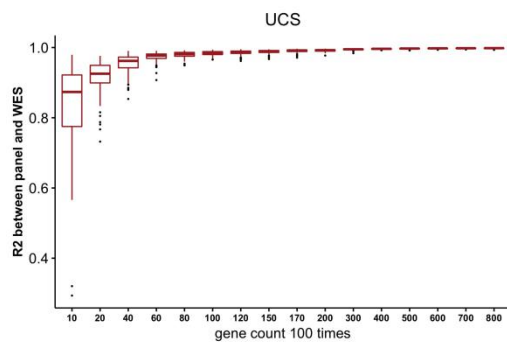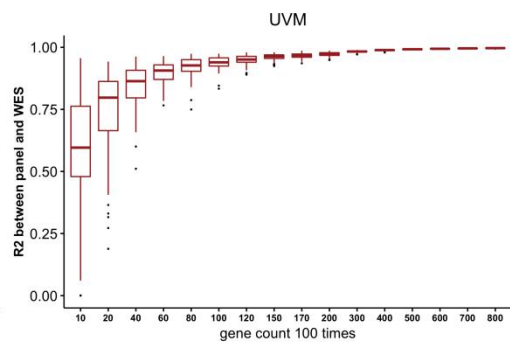

**Figure S4.** Median  $R^2$  between between synonymous mutations included and excluded for random gene panel TMB and WES TMB.

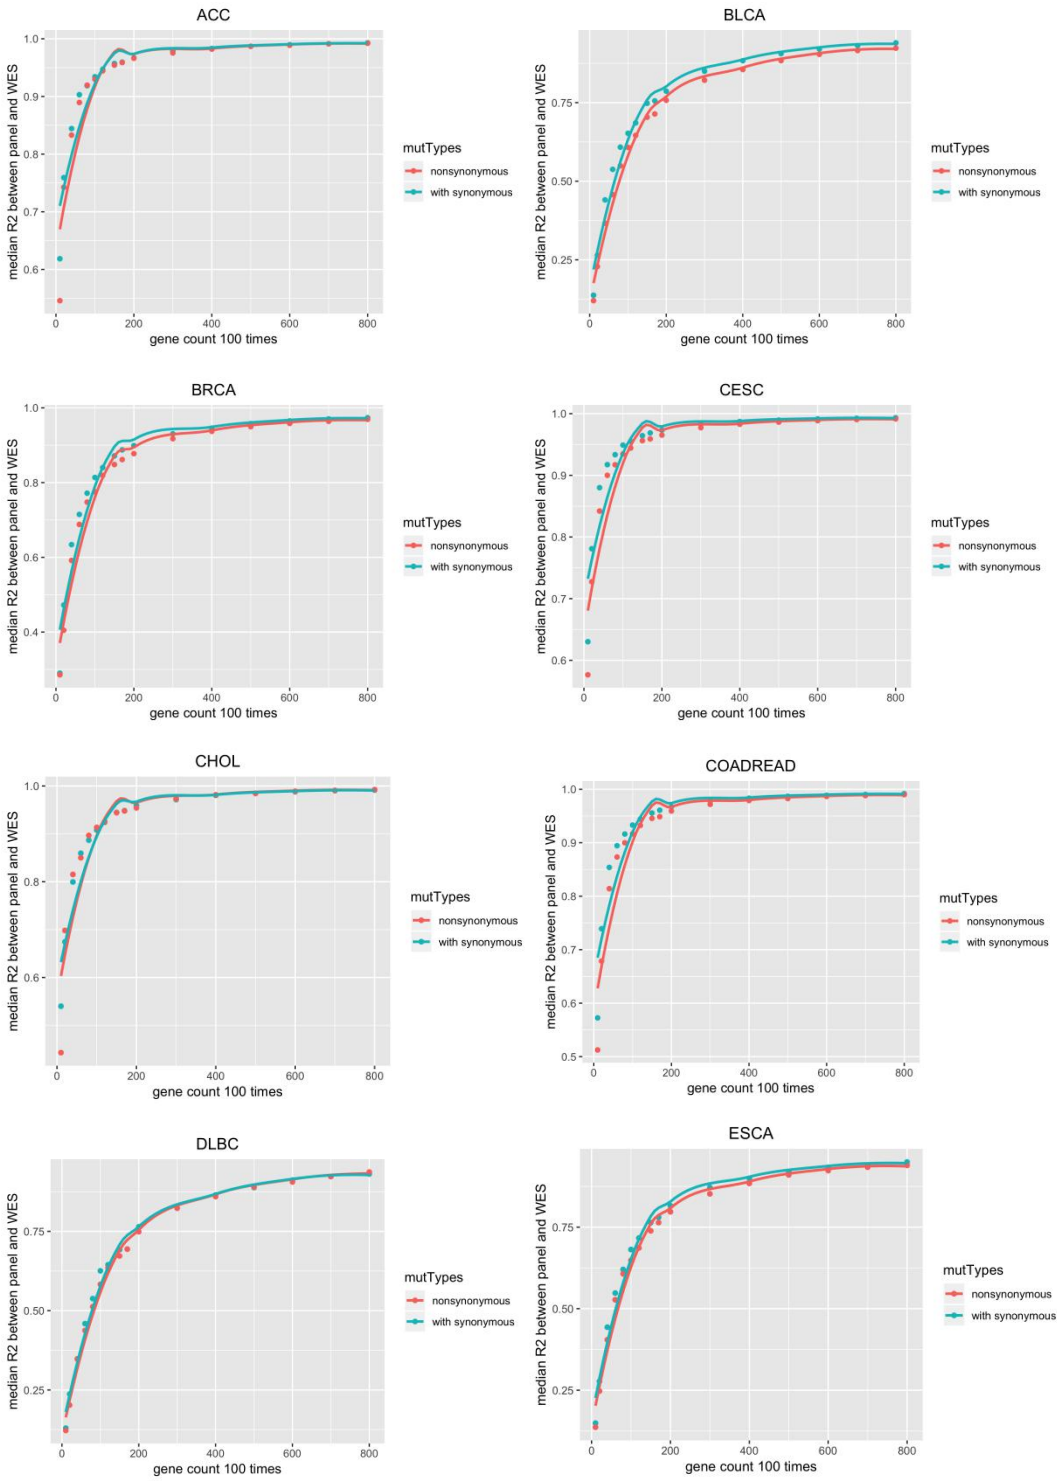

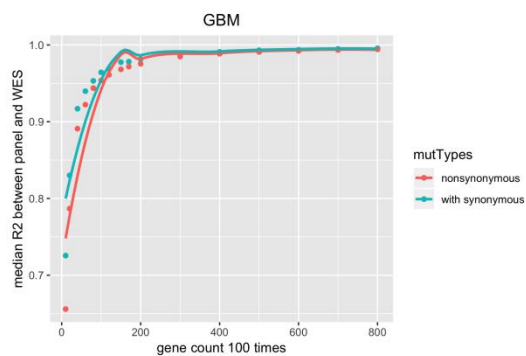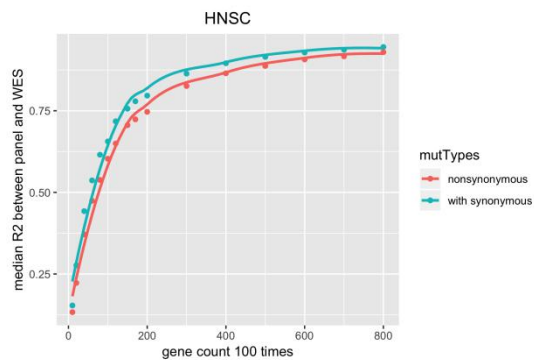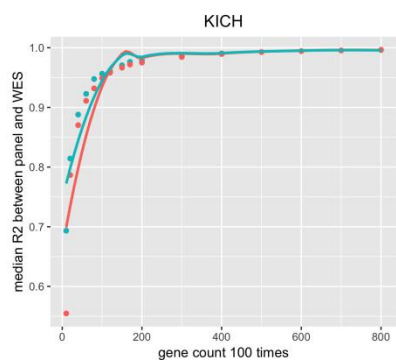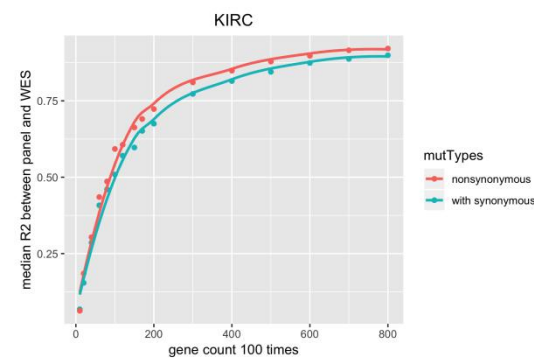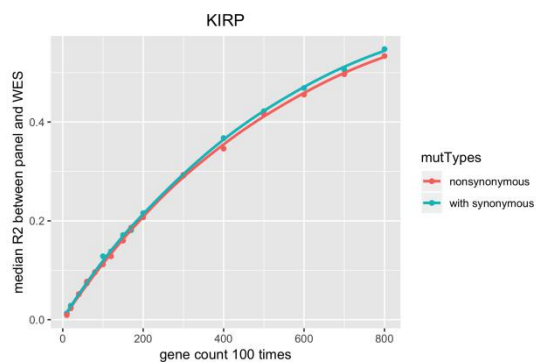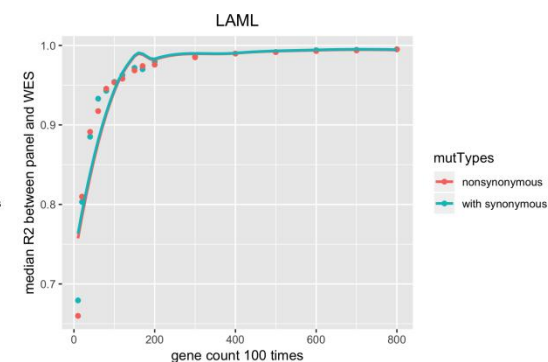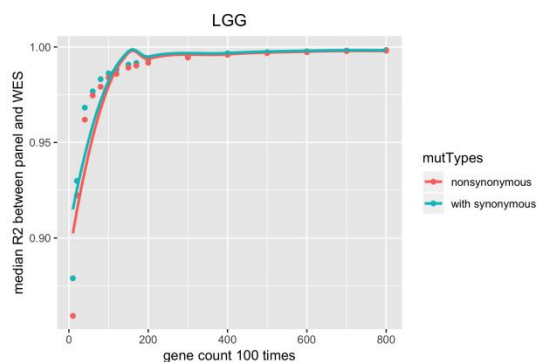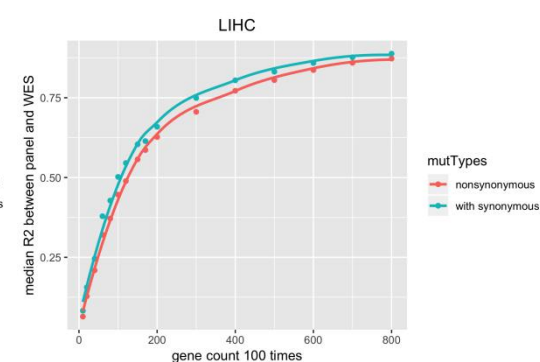



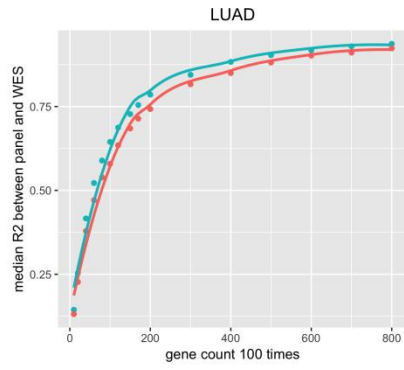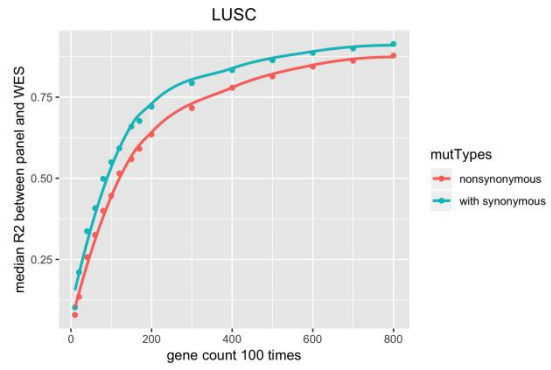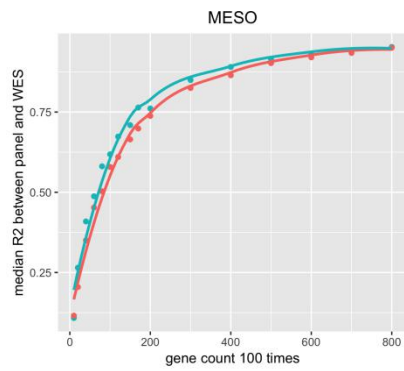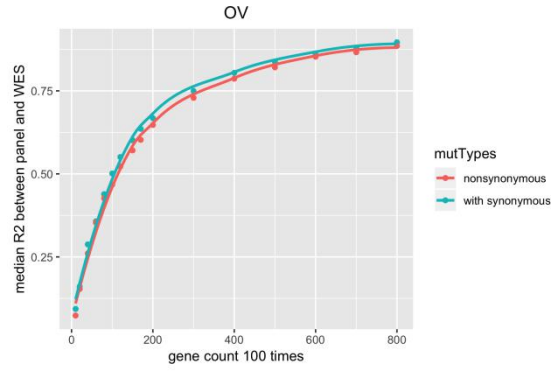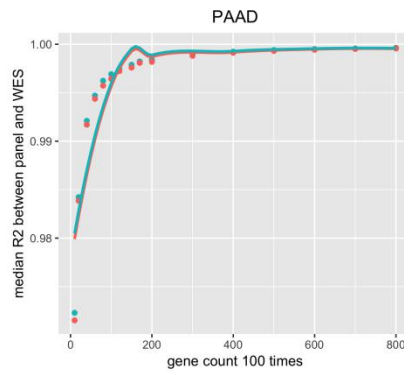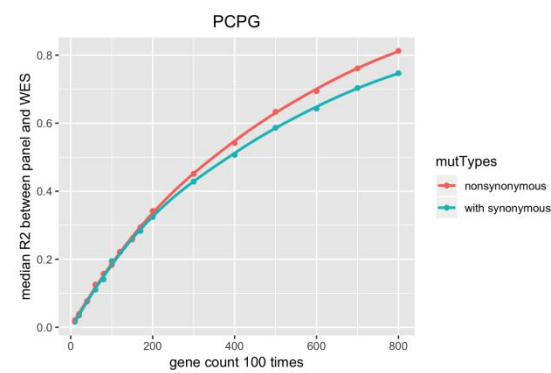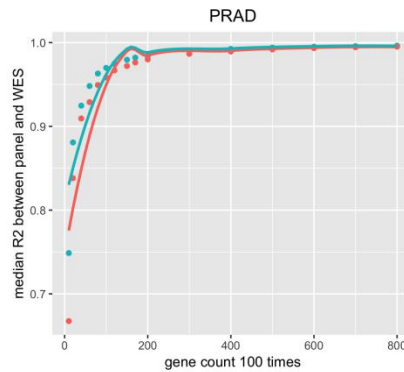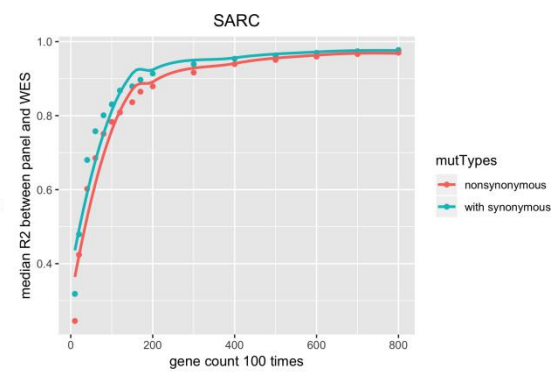

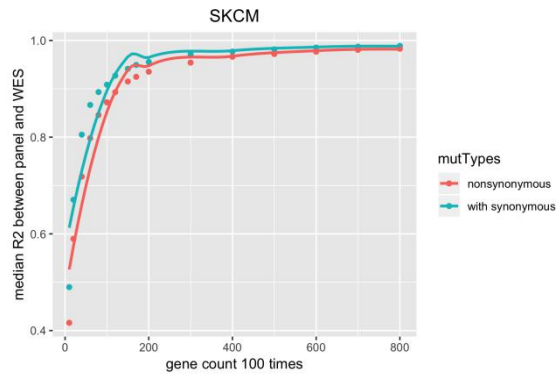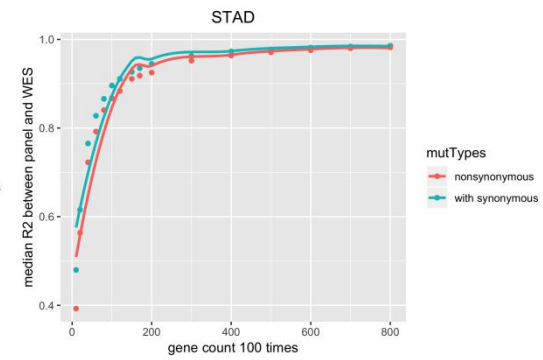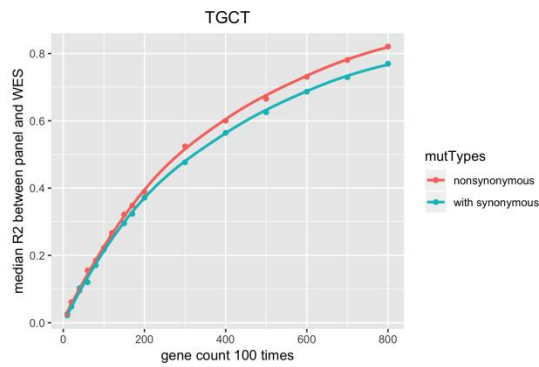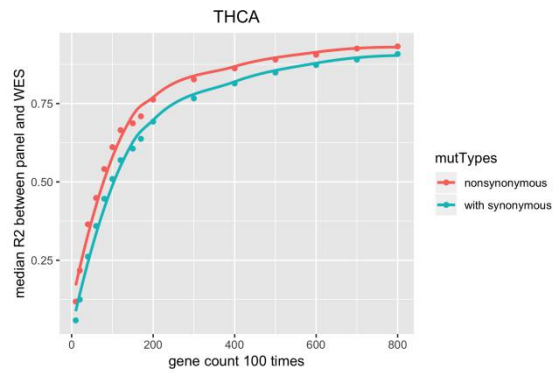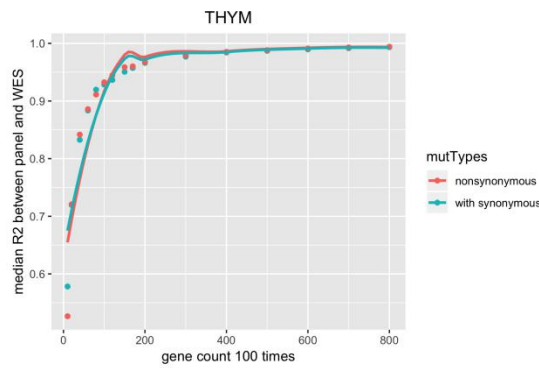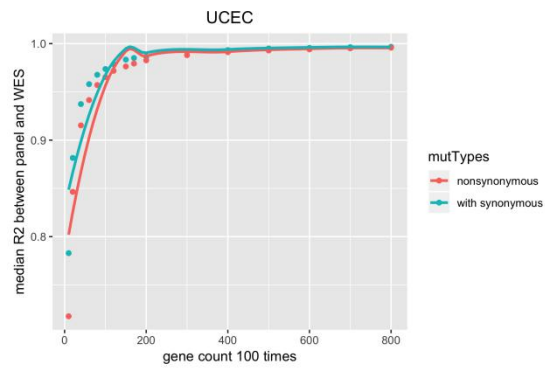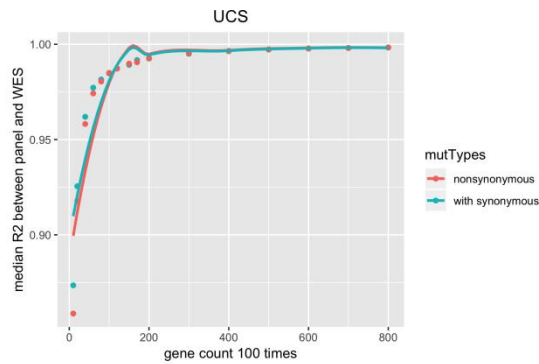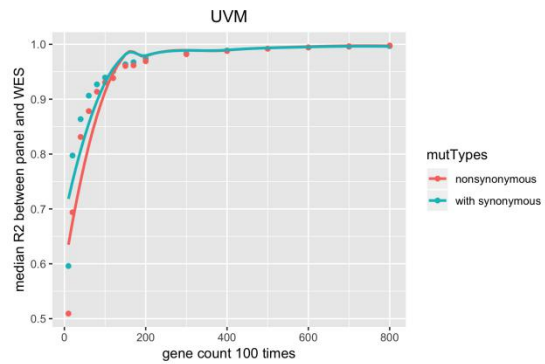

**Figure S5.** Driver gene count in SepPanel cross 32 cancer types. Orange bar represents the gene count of SepPanel, blue bar represents overlap of SepPanel with driver genes.

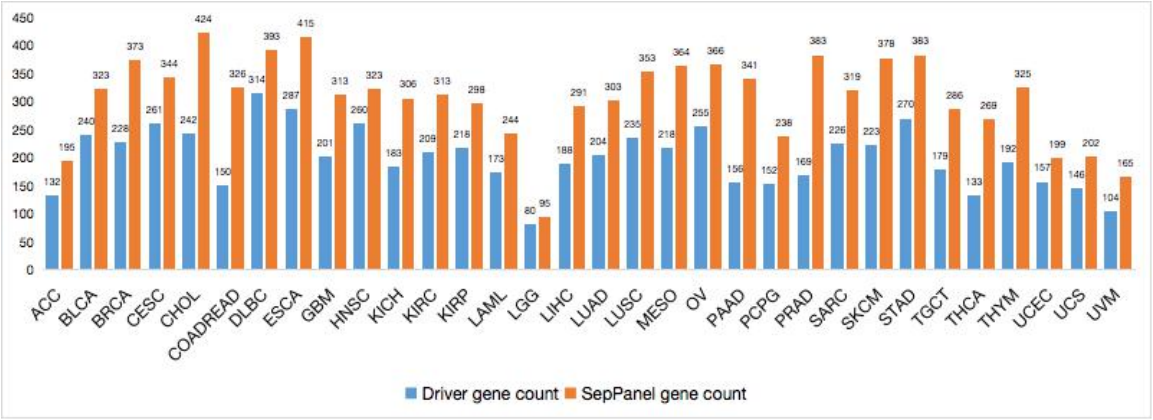

**Table S1.** Cancer types and the relative number of samples.

| <b>Cancer Types</b>                                              | <b>Abbreviations</b> | <b>Sample counts</b> |
|------------------------------------------------------------------|----------------------|----------------------|
| Acute Myeloid Leukemia                                           | LAML                 | 149                  |
| Adrenocortical carcinoma                                         | ACC                  | 92                   |
| Bladder Urothelial Carcinoma                                     | BLCA                 | 412                  |
| Brain Lower Grade Glioma                                         | LGG                  | 513                  |
| Breast invasive carcinoma                                        | BRCA                 | 1044                 |
| Cervical squamous cell carcinoma and endocervical adenocarcinoma | CESC                 | 305                  |
| Cholangiocarcinoma                                               | CHOL                 | 51                   |
| Colon adenocarcinoma/Rectum adenocarcinoma                       | COADREAD             | 591                  |
| Esophageal carcinoma                                             | ESCA                 | 184                  |
| Esophageal carcinoma                                             | ESCA                 | 184                  |
| Glioblastoma multiforme                                          | GBM                  | 396                  |
| Head and Neck squamous cell carcinoma                            | HNSC                 | 510                  |
| Kidney Chromophobe                                               | KICH                 | 66                   |
| Kidney renal clear cell carcinoma                                | KIRC                 | 339                  |
| Kidney renal papillary cell carcinoma                            | KIRP                 | 288                  |
| Liver hepatocellular carcinoma                                   | LIHC                 | 375                  |
| Lung adenocarcinoma                                              | LUAD                 | 569                  |
| Lung squamous cell carcinoma                                     | LUSC                 | 497                  |
| Lymphoid Neoplasm Diffuse Large B-cell Lymphoma                  | DLBC                 | 48                   |
| Mesothelioma                                                     | MESO                 | 83                   |
| Ovarian serous cystadenocarcinoma                                | OV                   | 443                  |
| Pancreatic adenocarcinoma                                        | PAAD                 | 183                  |
| Pheochromocytoma and Paraganglioma                               | PCPG                 | 179                  |
| Prostate adenocarcinoma                                          | PRAD                 | 498                  |
| Sarcoma                                                          | SARC                 | 255                  |
| Skin Cutaneous Melanoma                                          | SKCM                 | 470                  |
| Stomach adenocarcinoma                                           | STAD                 | 441                  |
| Testicular Germ Cell Tumors                                      | TGCT                 | 150                  |
| Thymoma                                                          | THYM                 | 123                  |
| Thyroid carcinoma                                                | THCA                 | 496                  |
| Uterine Carcinosarcoma                                           | UCS                  | 57                   |
| Uterine Corpus Endometrial Carcinoma                             | UCEC                 | 542                  |
| Uveal Melanoma                                                   | UVM                  | 80                   |

**Table S2.** SepPanels in 32 cancer types.(Please see excel file in zip named “TableS2.xlsx”. The file “TableS2” is as a separate supplementary file in “supplementary\_material.zip”, not included in this supplementary PDF.)

**Table S3.** Genes may derive neoantigens. Genes with upregulation of gene expression, high mutation frequency and high MHC affinity in CRC-, STAD-, and UCEC- SepPanel, F1CDx and MSK gene panel.

| Genes   | Resource           | STAD-SepPanel | F1CDx | MSK | Cancer types |
|---------|--------------------|---------------|-------|-----|--------------|
| AXIN2   | Rooney/TCIA/TSNAdb | √             | √     | √   | CRC          |
| BRCA2   | Rooney/TSNAdb      | √             | √     | √   | CRC          |
| COL5A3  | Rooney/TCIA/TSNAdb |               | √     |     | CRC          |
| DNAH12  | Rooney             |               | √     |     | CRC          |
| DNAH12  | TSNAdb             |               | √     |     | CRC          |
| DNMT3B  | Rooney/TCIA/TSNAdb |               |       | √   | CRC          |
| EPHB1   | Rooney/TSNAdb      |               | √     | √   | CRC          |
| MUC16   | Rooney/TSNAdb      | √             |       |     | CRC          |
| ROBO2   | Rooney/TSNAdb      | √             |       |     | CRC          |
| ASPM    | Rooney/TCIA/TSNAdb | √             | √     |     | STAD         |
| BRCA2   | Rooney/TCIA/TSNAdb | √             | √     | √   | STAD         |
| CACNA1D | Rooney/TCIA/TSNAdb | √             |       |     | STAD         |
| CARD11  | Rooney/TCIA/TSNAdb | √             | √     | √   | STAD         |
| COL1A2  | Rooney/TSNAdb      | √             |       |     | STAD         |
| COL5A1  | TCIA/TSNAdb        | √             | √     |     | STAD         |
| DMBT1   | Rooney/TCIA/TSNAdb | √             |       |     | STAD         |
| EPHB2   | Rooney/TCIA/TSNAdb | √             |       |     | STAD         |
| FN1     | Rooney/TCIA/TSNAdb | √             | √     |     | STAD         |
| MUC16   | Rooney/TSNAdb      | √             |       |     | STAD         |
| POLQ    | Rooney/TCIA/TSNAdb | √             |       |     | STAD         |
| RNF43   | Rooney/TCIA/TSNAdb | √             |       | √   | STAD         |
| ROS1    | Rooney/TSNAdb      | √             |       | √   | STAD         |
| SALL4   | Rooney/TSNAdb      | √             |       |     | STAD         |
| ALK     | Rooney/TSNAdb      |               | √     | √   | UCEC         |
| ALPK2   | Rooney/TSNAdb      |               | √     |     | UCEC         |
| ANK1    | Rooney/TSNAdb      | √             |       |     | UCEC         |
| ASPM    | Rooney/TCIA/TSNAdb | √             | √     |     | UCEC         |
| BLM     | Rooney/TCIA/TSNAdb |               | √     | √   | UCEC         |
| BRCA1   | Rooney/TCIA/TSNAdb | √             | √     | √   | UCEC         |
| BRCA2   | Rooney/TSNAdb      | √             | √     | √   | UCEC         |
| BRIP1   | Rooney/TSNAdb      |               | √     | √   | UCEC         |
| CDH1    | Rooney/TCIA/TSNAdb | √             | √     | √   | UCEC         |
| CHEK2   | Rooney/TCIA/TSNAdb |               | √     | √   | UCEC         |

|        |                    |   |   |   |      |
|--------|--------------------|---|---|---|------|
| CIT    | Rooney/TCIA/TSNAdb | √ |   |   | UCEC |
| DNMT3B | Rooney/TCIA/TSNAdb |   |   | √ | UCEC |
| ERBB3  | Rooney/TCIA/TSNAdb |   | √ | √ | UCEC |
| ERBB4  | Rooney/TSNAdb      |   | √ | √ | UCEC |
| EZH2   | Rooney/TCIA/TSNAdb |   | √ | √ | UCEC |
| FANCA  | Rooney/TCIA/TSNAdb |   | √ | √ | UCEC |
| FANCD2 | Rooney/TCIA/TSNAdb |   | √ |   | UCEC |
| FAT2   | Rooney/TSNAdb      | √ |   |   | UCEC |
| FBN2   | Rooney/TCIA/TSNAdb |   | √ |   | UCEC |
| MST1R  | Rooney/TCIA/TSNAdb |   |   | √ | UCEC |
| MUC16  | Rooney/TCIA/TSNAdb | √ |   |   | UCEC |
| MUC4   | TCIA/TSNAdb        | √ |   |   | UCEC |
| MYH14  | Rooney/TCIA/TSNAdb | √ |   |   | UCEC |
| POLQ   | Rooney/TSNAdb      | √ |   |   | UCEC |
| RNF43  | Rooney/TCIA/TSNAdb | √ |   | √ | UCEC |

---
